# Supplementary material for: Periodontal pathogens promote cancer aggressivity via TLR/MyD88 triggered activation of Integrin/FAK signaling that is therapeutically reversible by a probiotic bacteriocin
Source: PubMed Central journal article supplement (PMC7529280; doi:10.1371/journal.ppat.1008881), 2020-10-01

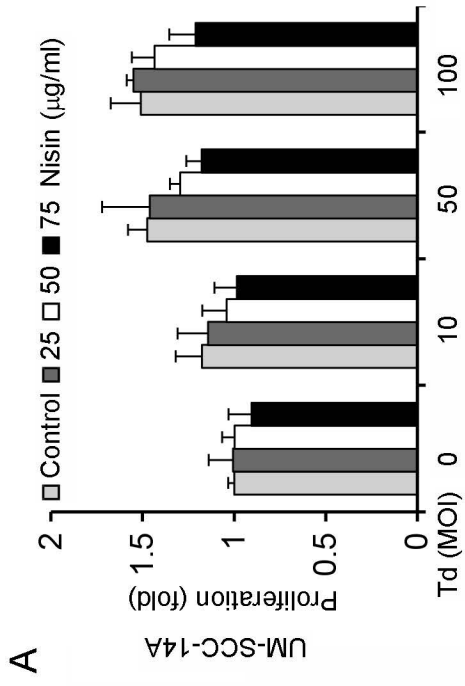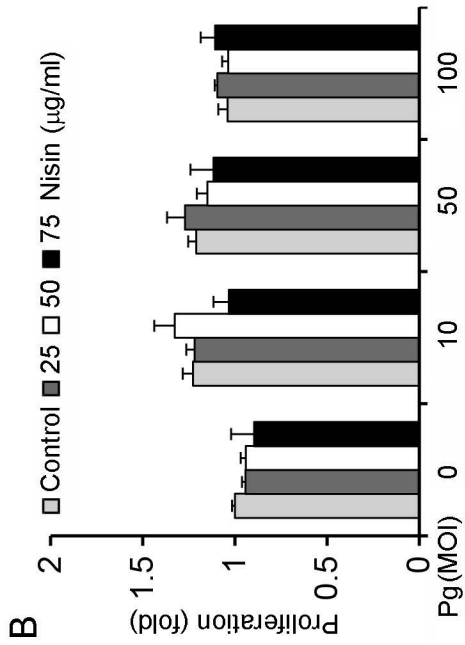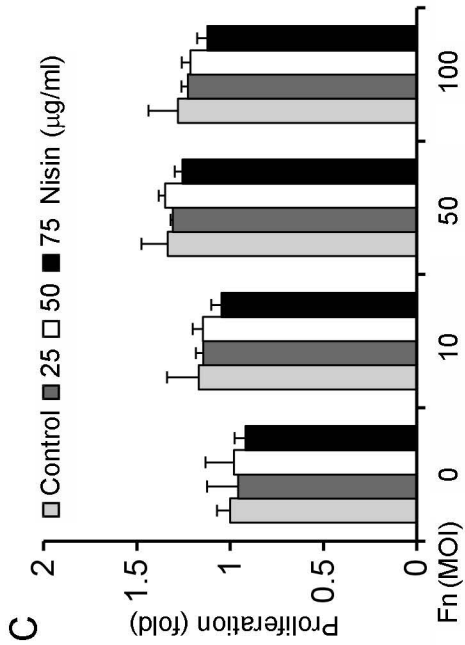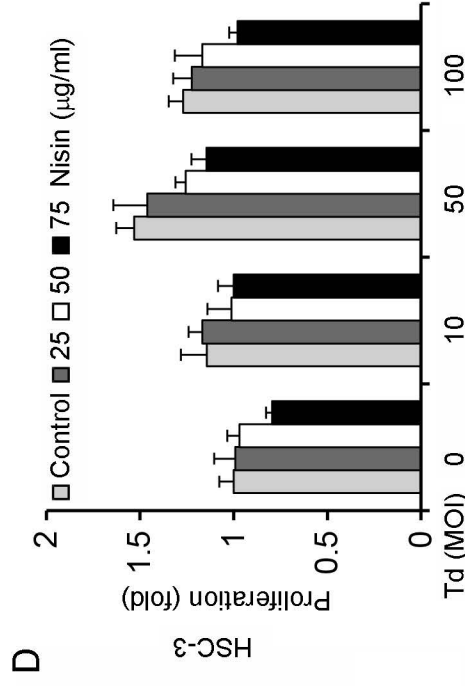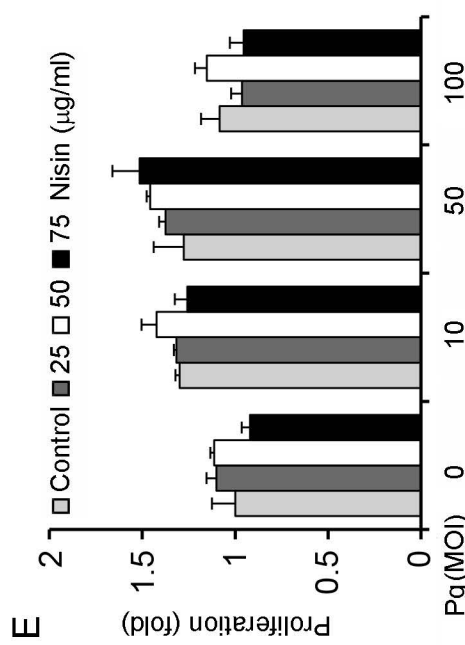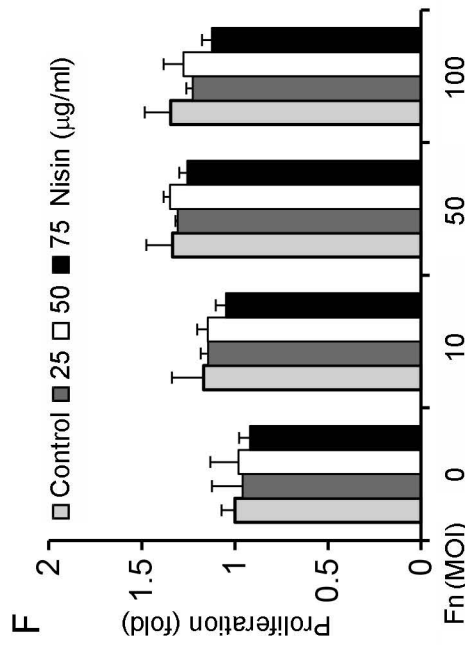

Supplement: ppat.1008881.s002.pdf [file ppat.1008881.s002.pdf]
