# Supplementary material for: Periodontal pathogens promote cancer aggressivity via TLR/MyD88 triggered activation of Integrin/FAK signaling that is therapeutically reversible by a probiotic bacteriocin
Source: PubMed Central journal article supplement (PMC7529280; doi:10.1371/journal.ppat.1008881), 2020-10-01

A

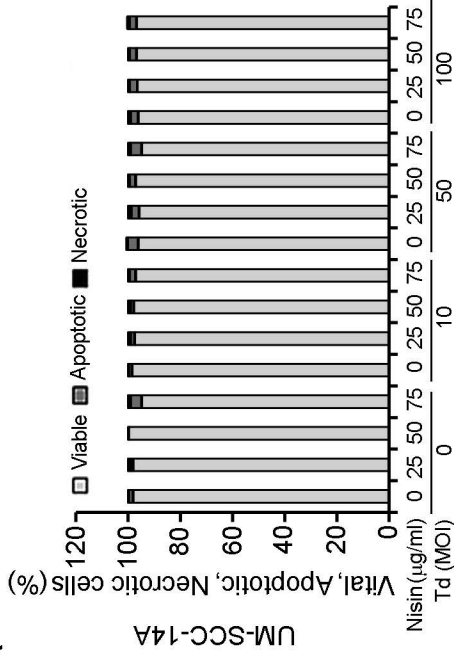

B

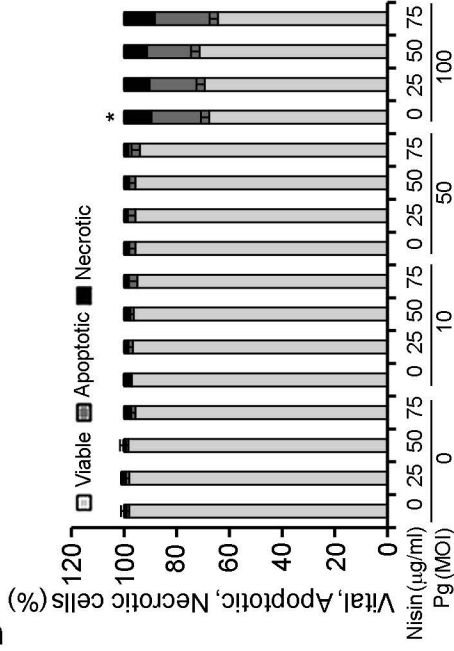

C

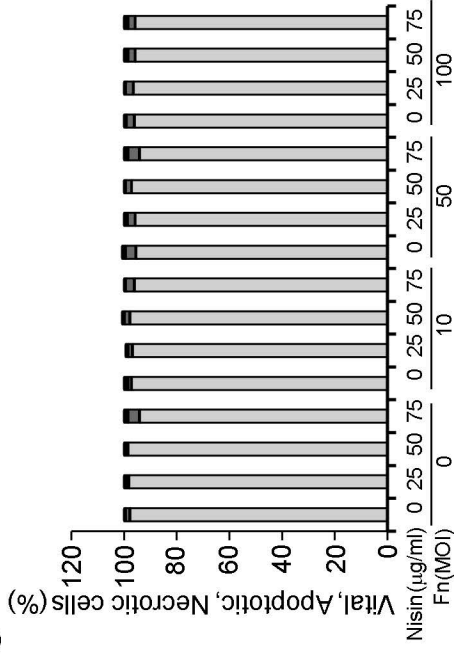

D

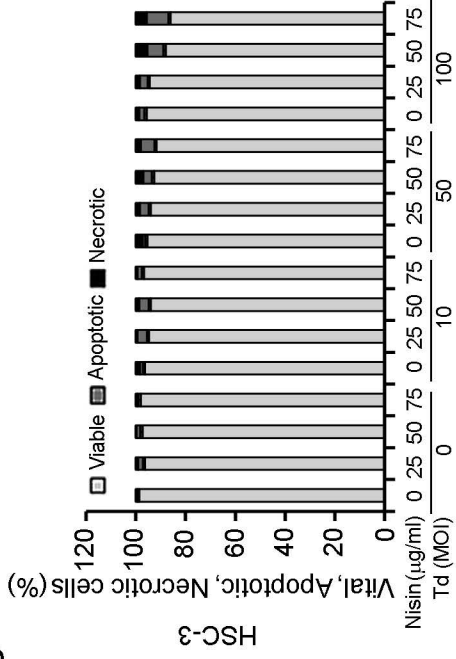

E

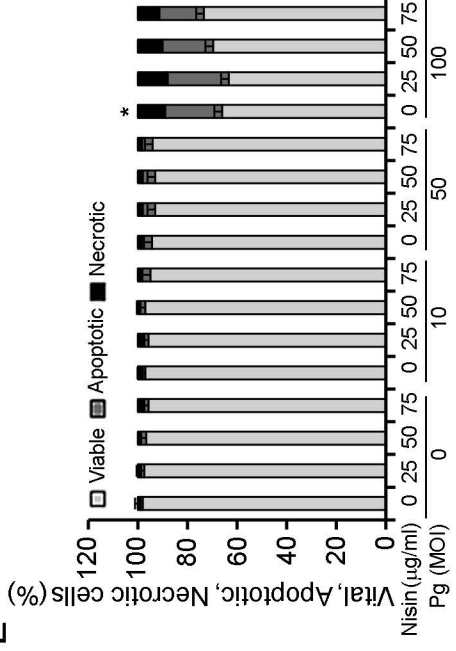

F

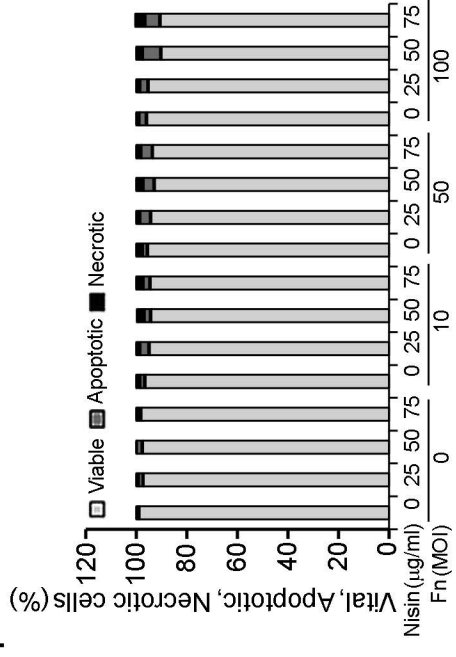

Supplement: ppat.1008881.s003.pdf [file ppat.1008881.s003.pdf]
